# Supplementary material for: Few-layer graphene based sponge as a highly efficient, recyclable and selective sorbent for organic solvents and oils
Source: Royal Society of Chemistry journal article supplement (doi:10.1039/c5ra06737e), 2015-01-01
Supplement: c5ra06737e4.pdf [file c5ra06737e4.pdf]

## Supporting Information

# Few-layer Graphene based Sponge as a Highly Efficient, Recyclable and Selective Sorbents for Organic Solvents and Oils

Er-Chieh Cho,<sup>a</sup> Yu-Sheng Hsiao,<sup>\*b</sup> Kuen-Chan Lee,<sup>\*c</sup> and Jen-Hsien Huang,<sup>\*d</sup>

Department of Clinical Pharmacy, School of Pharmacy, College of Pharmacy, Taipei Medical University, Taipei (Taiwan), 110, Department of Fragrance and Cosmetic Science, Kaohsiung Medical University, Kaohsiung (Taiwan), 80708, Department of Materials Engineering, Ming Chi University of Technology, New Taipei City (Taiwan), 24301, and Department of Green Material Technology, Green Technology Research Institute, Kaohsiung (Taiwan), 30010.

<sup>b,\*</sup>Corresponding author. E-mail: yshsiao@mail.mcut.edu.tw. Telephone: +886-2-29089899 ext 4458. Fax: +886-2-29084091

<sup>c,\*</sup>Corresponding author. E-mail: klee@kmu.edu.tw. Telephone: +886-7-3121101 ext 2818. Fax: +886-7-3210683

<sup>d,\*</sup>Corresponding author. E-mail: 295604@cpc.com.tw. Telephone: +886-7-5824141 ext 7331. Fax: +886-7-5887302

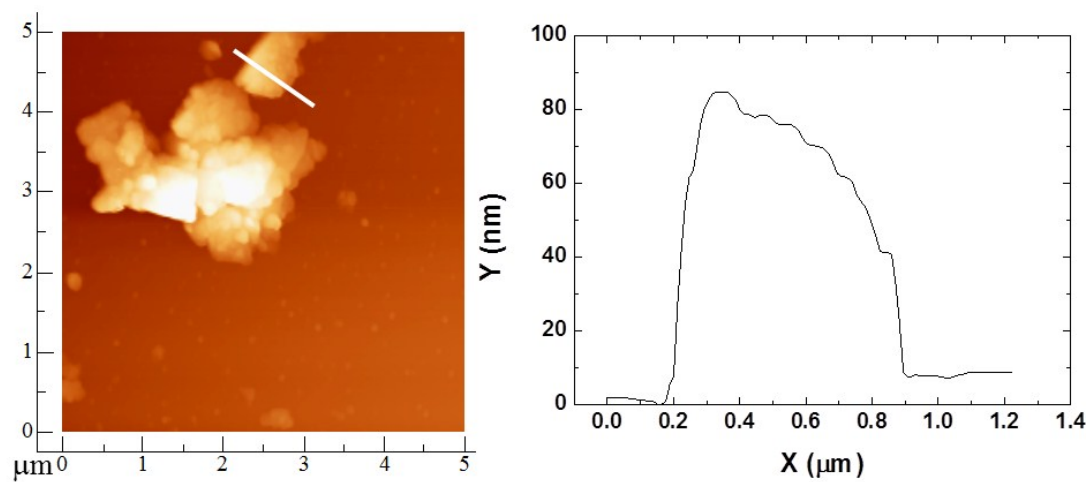

Figure S1. The AFM image and its corresponding surface profile of MLG.

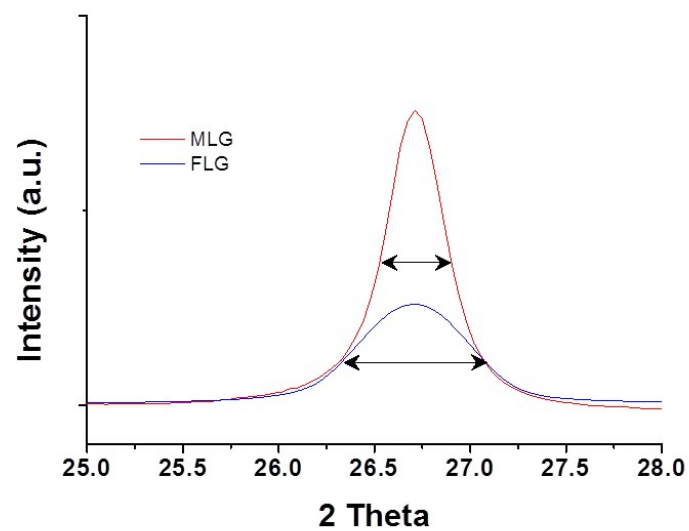

Figure S2 The comparison of the FWHM for FLG and MLG.

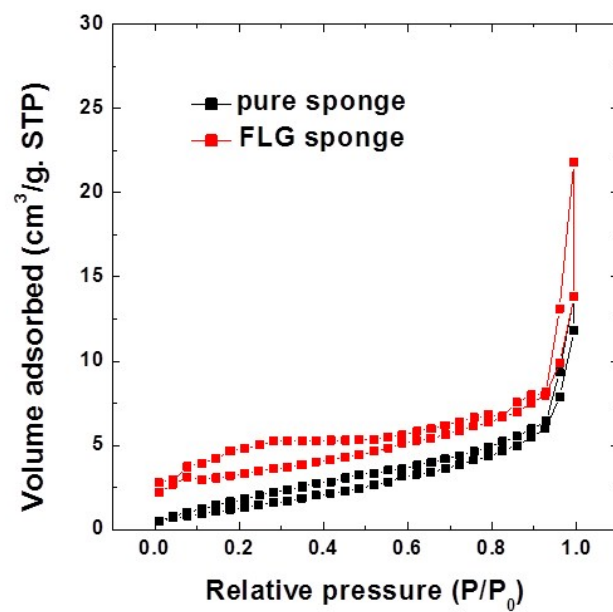

Figure S3. BET analysis of the pure sponge and FLG modified sponge.

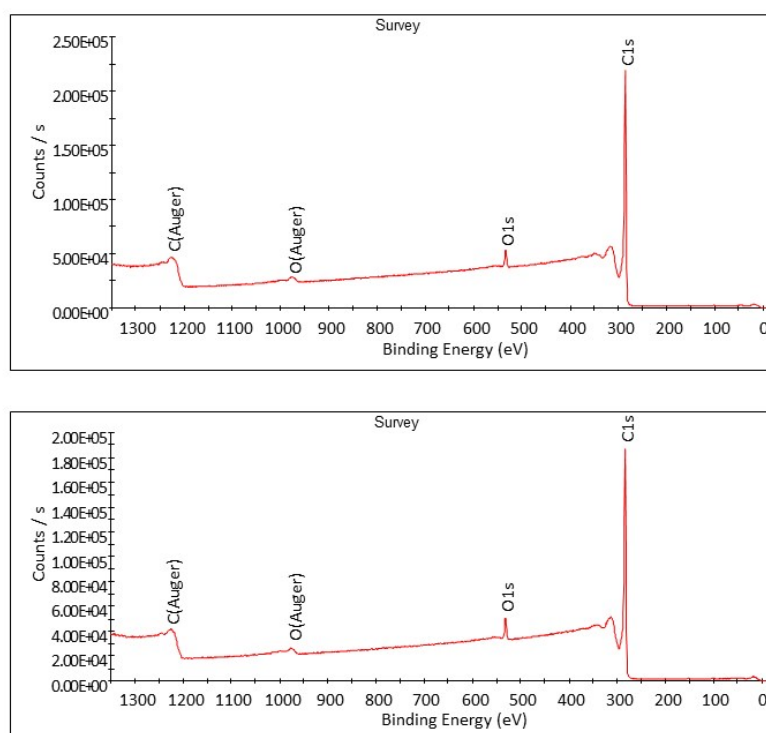

Figure S4. The XPS spectrum of graphite and MLG.

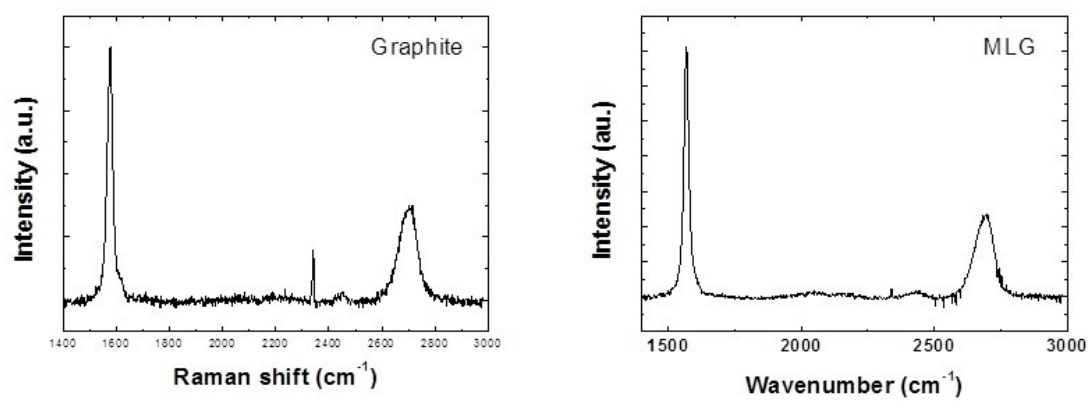

Figure S5. The Raman spectrum of graphite and MLG.
